# Supplementary material
Source: PubMed Central journal article supplement (PMC10152529)
Supplement: sj-pdf-1-han-10.1177_15589447211030692.pdf [file sj-pdf-1-han-10.1177_15589447211030692.pdf]

## Appendix

### Complete survey

|                                                                                                                                                                                                                   |
|-------------------------------------------------------------------------------------------------------------------------------------------------------------------------------------------------------------------|
| Did you like your telemedicine visit? (0-10, 10 being the best)                                                                                                                                                   |
| Did you feel like your provider spent enough time with you? (0-10, 10 being the best)                                                                                                                             |
| Despite the risks of the pandemic, would you rather have had the visit in person? (Yes, No)                                                                                                                       |
| If there was not a pandemic and instead there was a normal health care environment, would you rather have had the visit in person? (Yes, No)                                                                      |
| With the exception of safety from COVID-19, what was the single best part of the telemedicine visit? (Free response)                                                                                              |
| What was the most difficult part of your telemedicine experience? (Free response)                                                                                                                                 |
| How easy was it to access and use the telemedicine program? (0-10, 10 being the easiest)                                                                                                                          |
| How difficult was it to explain your symptoms to your provider compared to a standard in-person appointment? (0-10, 0 being just as easy, 10 being extremely difficult)                                           |
| Compared to a standard in-person appointment, how difficult was it to understand the explanations of your condition and instructions for medical care? (0-10, 0 being just as easy, 10 being extremely difficult) |
| Do you believe that your physician was able to understand, diagnose, and treat your condition just as well over telemedicine as they would have been able to in-person? (Yes, No)                                 |
| Did you find that your telemedicine visit was of limited value, in that an in-person visit was required soon afterwards? (Yes, No)                                                                                |
| If you answered Yes, please state why.                                                                                                                                                                            |
| With the pandemic still in effect and no vaccine, would you rather have future visits with your hand surgeon as telemedicine or in-person visits? (Free response)                                                 |
| In the absence of the pandemic, would you rather have future visits with your hand surgeon as telemedicine or in-person visits? (Telemedicine/In-person)                                                          |
| In the absence of the pandemic, please explain what factor would most make telemedicine less or more favorable to you than an in-person visit. (Free response)                                                    |
| Is there an optimal telemedicine appointment time during the day for you? (Before work, Lunch break, After work)                                                                                                  |
| Would you recommend telemedicine visits to a friend or family member? (Yes, No)                                                                                                                                   |
| What is your single greatest recommendation for making the telemedicine process better? (Free response)                                                                                                           |
| Had you experienced a telemedicine visit prior to this experience with your hand surgeon? (Yes, No)                                                                                                               |
